# Supplementary material
Source: PubMed Central journal article supplement (PMC2818963)
Supplement: 0909191107_pnas.0909191107_SI.pdf [file 0909191107_pnas.0909191107_SI.pdf]

# Supporting Information

Lu et al. 10.1073/pnas.0909191107

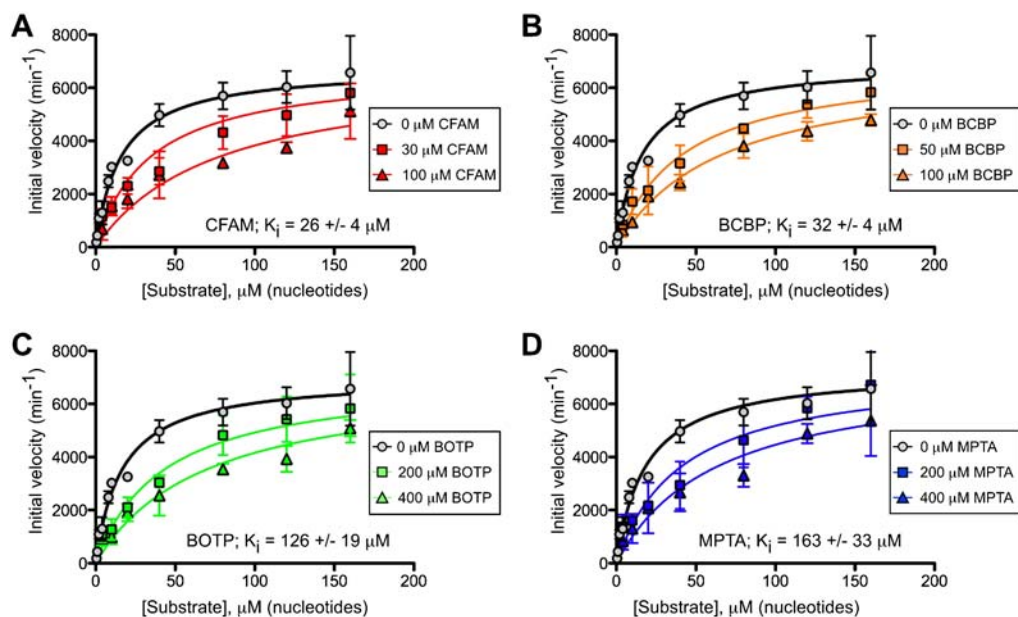

**Fig. S1.** Saturation kinetic data of ExoI nuclease activity on a SSB/ssDNA substrate in the presence of indicated concentrations of (A) CFAM, (B) BCBP, (C) BOTP, or (D) MPTA. Data points are the mean of three independent measurements with error bars as one standard deviation of the mean. In some instances, error bars are obscured by the symbols. Lines depict a global fit of the data to a competitive inhibition model.

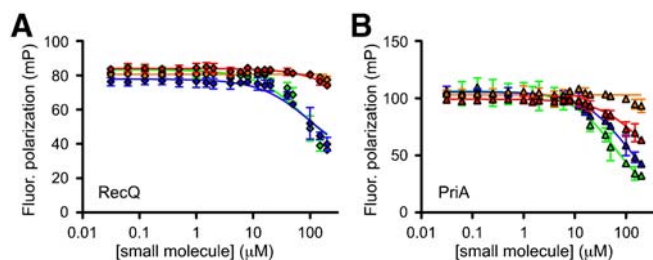

**Fig. S2.** Small-molecule inhibitors disrupt RecQ/ and PriA/F-SSB-Ct complexes. Inhibitors [CFAM (red), BCBP (orange), BOTP (green), and MPTA (blue)] were incubated at indicated concentrations with (A) RecQ/F-SSB-Ct or (B) PriA/F-SSB-Ct complexes. Decreases in FP are attributed to inhibitor-mediated displacement of the F-SSB-Ct peptide. FP values are presented as the mean of three measurements with error bars depicting one standard deviation. In some instances, error bars are sufficiently small to be obscured by the symbols.

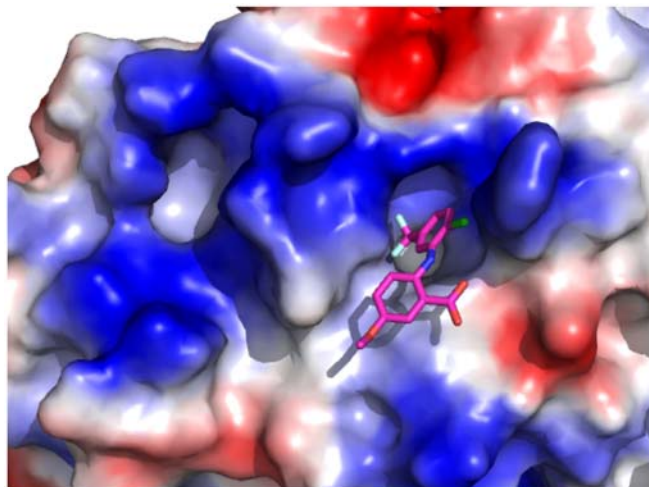

**Fig. S3.** Model of CFAM bound to the A site in Exol. CFAM was modeled in the A site of Exol by applying a positional transformation derived from a least-squares fit of the B-site peptide onto the A-site peptide (both peptides are shown in Fig. 3A).

**Table S1.** Fits of the inhibitor kinetic data to a mixed inhibition model

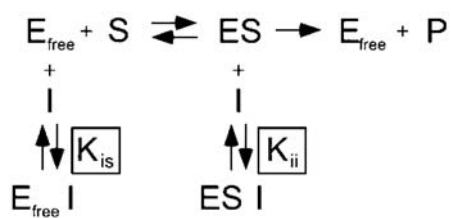

| Compound | $K_{\text{is}}$ ( $\mu\text{M}$ ) | $K_{\text{ii}}$ ( $\mu\text{M}$ ) |
|----------|-----------------------------------|-----------------------------------|
| CFAM     | $33.9 \pm 11.4$                   | $973 \pm 154$                     |
| BCBP     | $38.6 \pm 9.5$                    | $1832 \pm 346$                    |
| BOTP     | $147.8 \pm 41.8$                  | $9445 \pm 2740$                   |
| MPTA     | $144.9 \pm 53.0$                  | $\sim 3 \times 10^9$              |

**Table S2. X-ray data collection and refinement statistics**

| Data collection                                                   | CFAM-bound Exol                               | BCBP-bound Exol                               |
|-------------------------------------------------------------------|-----------------------------------------------|-----------------------------------------------|
| Space group                                                       | P2 <sub>1</sub> 2 <sub>1</sub> 2 <sub>1</sub> | P2 <sub>1</sub> 2 <sub>1</sub> 2 <sub>1</sub> |
| Unit cell parameters (a, b, c (Å)) ( $\alpha, \beta, \gamma$ (°)) | 52.67, 91.94, 103.1, 90, 90, 90               | 53.82, 91.97, 106.2, 90, 90, 90               |
| Resolution range (High resolution) (Å)                            | 50-1.60 (1.66-1.60)                           | 50-1.55 (1.61-1.55)                           |
| R <sub>sym</sub> (%) <sup>*</sup>                                 | 5.9 (35.0)                                    | 6.4 (36.5)                                    |
| Completeness (%)                                                  | 89.9 (93.2)                                   | 93.0 (85.9)                                   |
| Redundancy                                                        | 5.2 (3.3)                                     | 5.7 (2.1)                                     |
| $\langle I/\sigma \rangle$                                        | 33.6 (2.5)                                    | 34.4 (2.7)                                    |
| Refinement <sup>†</sup>                                           |                                               |                                               |
| Resolution (Å)                                                    | 18.8–1.60                                     | 26.9–1.55                                     |
| R <sub>work</sub> /R <sub>free</sub> (%) <sup>‡</sup>             | 20.6/23.1                                     | 17.2/20.7                                     |
| Number of protein atoms <sup>§</sup>                              | 3774                                          | 3761                                          |
| Number of solvent atoms <sup>¶</sup>                              | 472                                           | 521                                           |
| $\langle B$ factor $\rangle$ protein                              | 15.4                                          | 23.8                                          |
| $\langle B$ factor $\rangle$ inhibitor                            | 31.7                                          | 27.2                                          |
| $\langle B$ factor $\rangle$ solvent                              | 28.2                                          | 35.7                                          |
| RMSD bond lengths (Å)                                             | 0.009                                         | 0.009                                         |
| RMSD bond angles (°)                                              | 0.84                                          | 1.36                                          |
| Ramachandran statistics, % core                                   | 98.3                                          | 98.3                                          |
| % allowed                                                         | 1.7                                           | 1.7                                           |
| % generously allowed                                              | 0                                             | 0                                             |
| % disallowed                                                      | 0                                             | 0                                             |

<sup>\*</sup>R<sub>sym</sub> =  $\sum_j |I_j - \langle I \rangle| / \sum_j I_j$ , where  $I_j$  is the intensity measurement for reflection  $j$  and  $\langle I \rangle$  is the mean intensity for multiply recorded reflections.

<sup>†</sup>CFAM-bound structure refinement was isotropic; BCBP-bound structure refinement was anisotropic.

<sup>‡</sup>R<sub>work,free</sub> =  $\sum ||F_{obs}| - |F_{calc}|| / |F_{obs}|$ , where the working and free R factors are calculated by using the working and free reflection sets, respectively. The free R reflections (5% of the total) were held aside throughout refinement.

<sup>§</sup>Several side-chains were modeled in multiple rotamers/conformations; in cases where atoms have been modeled in multiple conformations, each modeled position is counted in the number of protein atoms (i.e., if a given atom is modeled in two positions it is counted as two protein atoms).

<sup>¶</sup>Includes water, DMSO, and ethylene glycol.
